# Supplementary material for: The interrelationship between diabetes mellitus and peripheral arterial disease
Source: Atypon-hosted journal article supplement (doi:10.1024/0301-1526/a000925), 2020-11-11
Supplement: 0301-1526_a000925_esm1.pdf [file 0301-1526_a000925_esm1.pdf]

## Electronic Supplementary Material 1

**Table.** Studies included in this systematic review

| Study                            | Country                                                 | Study               | Period    | Patients (n) | Age mean (years) | Sex male (%) | Diabetes (n) | EVT/open                          | Lesion located                    |
|----------------------------------|---------------------------------------------------------|---------------------|-----------|--------------|------------------|--------------|--------------|-----------------------------------|-----------------------------------|
| Chang et al. 2019 [1]            | Taiwan                                                  | retrospective study | 2008-2014 | 55           | 66.5             | 64           | 55           | EVT                               | infragenua                        |
| Ali et al. 2018 [2]              | England                                                 | retrospective study | 2018      | 40           | n.a.             | n.a.         | 36           | only diagnosis and prognosis data | only diagnosis and prognosis data |
| Cornejo del Rio et al. 2017 [15] | Spain                                                   | retrospective study | 2010-2014 | 1592         | 61.5             | 43           | 159200       | n.a.                              | all                               |
| Mohamedi et al. 2016 [16]        | multicenter<br>Australia, UK, USA, France               | retrospective study | 1996-2016 | 11140        | 66               | n.a.         | 11140        | all                               | all                               |
| Mohamedi et al. 2016 [17]        | multicenter<br>Australia, UK, USA, France, China, Italy | retrospective study | 2001-2016 | 10624        | 65.7             | 57           | 10624        | all                               | all                               |
| Faglia et al. 2011 [18]          | Italy                                                   | retrospective study | 2011      | 219          | n.a.             | n.a.         | 219          | all                               | all                               |
| Lazzarini et al. 2015 [19]       | England                                                 | systematic review   | 1980-2013 | 78 studies   | n.a.             | n.a.         | 33           | all                               | all                               |
| Coce et al. 2008 [20]            | Croatia                                                 | retrospective study | 1996-1999 | 350          | 61               | 54           | 350          | all                               | all                               |
| Velescu et al. 2016 [23]         | Spain                                                   | prospective study   | 2003-2014 | 6352         | 35-79            | 60           | 82           | only risk factors                 | only risk factors                 |

|                             |                      |                                     |           |       |                          |                        |          |                   |                   |
|-----------------------------|----------------------|-------------------------------------|-----------|-------|--------------------------|------------------------|----------|-------------------|-------------------|
| Rabia et al. 2007 [29]      | Malaysia             | retrospective study                 | 2007      | 200   | 61                       | 39.5                   | 200      | only risk factors | only risk factors |
| Rhee et al. 2007 [21]       | Indonesia            | retrospective study                 | 2007      | 6625  | 63.7                     | n.a.                   | 6625     | all               | all               |
| Rhee et al. 2015 [48]       | Korea                | retrospective study                 | 2017      | n.a   | n.a                      | n.a                    | Na       | only risk factors | only risk factors |
| Tseng et al. 2007 [22]      | Taiwan               | prospective study                   | 2006-2007 | 610   | 63.3                     | 268                    | 610      | only risk factors | only risk factors |
| Guerchet et al. 2012 [25]   | Bangui / Brazaville  | prospective study                   | 2008-2009 | 976   | 72 vs. 74                | 39 vs. 41              | 144      | only risk factors | only risk factors |
| Oyelade et al. 2012 [26]    | Nigeria              | prospective study                   | 2009-2010 | 219   | 63                       | 41                     | 219      | only risk factors | only risk factors |
| Yakubu et al. 2018 [27]     | Nigeria              | prospective study                   | 2013-2014 | 300   | 52.7                     | 41                     | 200      | only risk factors | only risk factors |
| Tavinthran et al. 2009 [28] | Singapore, Australia | retrospective study                 | 2009      | 3280  | 62.9                     | 44                     | 634      | only risk factors | only risk factors |
| Narayanan et al. 2010 [30]  | Singapore            | prospective study                   | 2004-2005 | 521   | 66.7                     | 48                     | 521      | only risk factors | only risk factors |
| Vitalis et al. 2017 [31]    | UK, Asia             | systematic review and meta-analysis | 2017      | n.a.  | n.a.                     | n.a.                   | n.a.     | all               | all               |
| Escobar et al. 2011 [49]    | Spain                | retrospective study                 | 2009      | 1462  | 78                       | 59                     | 1462     | only risk factors | only risk factors |
| Eshcol et al. 2014 [24]     | India                | retrospective study                 | 2001-2011 | 2512  | 57.5 (PAD) vs. 51 (nPAD) | 42 (PAD) vs. 66 (nPAD) | 2512     | prevalence data   | prevalence data   |
| Matsushita et al. 2019 [32] | USA                  | retrospective study                 | 1999-2019 | 38154 | 55                       | 4 groups               | 4 groups | only risk factors | only risk factors |
| Collins et al. 2010 [50]    | USA                  | retrospective study                 | 1992-2001 | 796   | 64.1                     | 99                     | 509      | all               | all               |
| Brechow et al. 2013 [34]    | Germany              | prospective study                   | 2000-2007 | 678   | 66.3                     | 69                     | 678      | all               | all               |
| Elgzyri et al. 2014 [45]    | Sweden               | prospective study                   | 1984-2006 | 478   | 74                       | 60                     | 478      | all               | all               |

|                              |                                       |                     |           |                                  |                  |                     |                             |                                  |                        |
|------------------------------|---------------------------------------|---------------------|-----------|----------------------------------|------------------|---------------------|-----------------------------|----------------------------------|------------------------|
| Elgzyri et al. 2013 [46]     | Sweden                                | prospective study   | 1984-2006 | 602                              | 76               | 60                  | 602                         | all                              | all                    |
| Freisinger et al. 2017 [35]  | Germany                               | retrospective study | 2009-2013 | 15332                            | 73.8             | 58                  | 3061                        | all                              | all                    |
| Gentile et al. 2016 [37]     | Sweden                                | retrospective study | 2008-2014 | 544                              | 76               | 60                  | 58                          | all                              | infrapopliteal         |
| Giugliano et al. 2012 [38]   | Italy                                 | retrospective study | 2010-2012 | 236                              | 64               | 74                  | 236                         | all                              | all                    |
| Hicks et al. 2016 [39]       | USA                                   | retrospective study | 2008-2014 | 2566                             | 69               | 67                  | 1818                        | all                              | intra- and infragenual |
| Hinchcliffe et al. 2012 [40] | USA, Netherlands, Sweden, Austria, UK | systematic review   | 1980-2010 | 8290                             | 36-74            | 37-96               | 8290                        | all                              | all                    |
| Ahmad et al. 2016 [51]       | England                               | retrospective study | 2003-2013 | 2003: 8,379,000, 2013: 9,045,200 | 50-84            | 2003: 44.7 vs. 51.8 | 2013: 985927 2003: 611667   | amputation and revascularization | all                    |
| Lin et al. 2019 [43]         | USA                                   | retrospective study | 2005-2013 | 16800                            | n.a.             | n.a.                | 65 vs. 58% (open surg. EVT) | all                              | all                    |
| Janas et al. 2018 [41]       | Poland                                | retrospective study | 2008-2012 | 204                              | 68               | 66                  | 132                         | all                              | all                    |
| Jude et al. 2001 [42]        | UK                                    | retrospective study | 1992-1996 | 150                              | 64.7             | n.a.                | 58                          | all                              | all                    |
| Baubeta et al. 2017 [47]     | Sweden                                | prospective study   | 1987-1994 | 16889                            | 70 (IC) 77 (CLI) | 54                  | 6640                        | all                              | all                    |
| Baubeta et al. 2018 [52]     | Sweden                                | prospective study   | 2008-2013 | 10617                            | 76.8             | 75                  | 5010                        | all                              | all                    |
| Liang et al. 2016 [61]       | Taiwan                                | retrospective study | 2016      | 172                              | n.a.             | n.a.                | 109                         | all                              | all                    |
| Prompers et al. 2008 [44]    | Italy                                 | prospective study   | 2003-2004 | 1088                             | 64.7             | 64                  | 1088                        | all                              | all                    |

|                            |         |                     |             |                                          |                           |                                                |                     |                    |                    |
|----------------------------|---------|---------------------|-------------|------------------------------------------|---------------------------|------------------------------------------------|---------------------|--------------------|--------------------|
| Humphries et al. 2016 [53] | USA     | retrospective study | 2005-2013   | 219547                                   | 64                        | 57                                             | 131731              | only amputation    | all                |
| Humphries et al. 2016 [54] | USA     | retrospective study | 2005-2013   | 219547                                   | 64                        | 57                                             | 131731              | only amputation    | all                |
| Fosse et al. 2009 [56]     | France  | retrospective study | 2002-2003   | 15353                                    | n.a.                      | n.a.                                           | 7955                | only amputation    | all                |
| Bruun et al. 2013 [57]     | Denmark | retrospective study | 2013        | 1381                                     | n.a.                      | n.a.                                           | 1381                | only amputation    | all                |
| Newhall et al. 2016 [55]   | Lebanon | retrospective study | 2007-2011   | 2.9 million (2007)<br>3.5 million (2011) | 76                        | n.a.                                           | 2.9 vs. 3.5 million | all                | all                |
| Heyer et al. 2015 [60]     | Germany | retrospective study | 2006 - 2012 | 4,010,870 insurants,<br>1625 pat.        | n.a.                      | 1625 pat. with DM and amputation               | amputation          | all                | all                |
| Santosa et al. 2015 [59]   | Germany | retrospective study | 2005-2010   | n.a.                                     | n.a.                      | n.a.                                           | n.a.                | amputation         | all                |
| Icks et al. 2011 [62]      | Germany | retrospective study | 2005-2010   | 444                                      | 69                        | 71.8                                           | 58.3                | amputation         | all                |
| Müller et al. 2016 [64]    | Austria | retrospective study | 2000-2010   | 331                                      | PAD: 64,<br>DM: 65        | PAD: 79,<br>DM: 76                             | 115                 | all                | all                |
| Melillo et al. 2016 [66]   | Italy   | retrospective study | 2011-2016   | 181                                      | 72                        | 56                                             | CLI pat. 100        | all                | all                |
| Müller et al. 2014 [63]    | Austria | prospective study   | 2001-2005   | 487                                      | 64-80 (4 groups)<br>48-79 | 115                                            | All                 | all                | all                |
| Charles et al. 2011 [65]   | Denmark | retrospective study | 2006-2011   | 1161                                     | 59                        | 59 (routine care) vs. 60 (intensive treatment) | 1161                | only clinical data | only clinical data |

|                               |                                                           |                     |           |                         |             |         |       |                                                |                                                |
|-------------------------------|-----------------------------------------------------------|---------------------|-----------|-------------------------|-------------|---------|-------|------------------------------------------------|------------------------------------------------|
| Soyoye et al. 2016 [67]       | Nigeria                                                   | retrospective study | 2016      | 300                     | 56 (DM), 55 | 66 pat. | 150   | traditional and no comparable diabetic factors | traditional and no comparable diabetic factors |
| Mwebaze et al. 2014 [68]      | Uganda                                                    | retrospective study | 2013-2014 | 146                     | 53          | 51      | 146   | diabetic factors                               | diabetic factors                               |
| Agrawal et al. 2014 [69]      | India                                                     | retrospective study | 2014      | 11157                   | n.a.        | 6661    | 11157 | only risk factors for DM                       | only risk factors for DM                       |
| Thiruvoipati et al. 2015 [70] | USA                                                       | retrospective study | 2015      | n.a.                    | n.a.        | n.a.    | n.a.  | only epidemiology                              | only epidemiology                              |
| Behrendt et al. 2018 [9]      | Germany, Finland, Norway, Australia, New Zealand, Hungary | retrospective study | 2010-2014 | 259 million inhabitants | 65          | n.a.    | n.a.  | all                                            | all                                            |
| Aarabi et al. 2020 [74]       | Germany                                                   | retrospective study | 2012-2016 | 70944                   | n.a.        | n.a.    | n.a.  | all                                            | all                                            |
| Kreutzburg et al. 2020 [6]    | Germany, USA                                              | retrospective study | 2008-2016 | 156217                  | n.a.        | 54      | 45303 | all                                            | all                                            |
| Londero et al. 2019 [58]      | Denmark                                                   | retrospective study | 1997-2014 | 100000 inhabitants      | 75.8        | 54      | 3820  | all                                            | all                                            |
| Cha et al. 2020 [70]          | Korea                                                     | retrospective study | 2006-2015 | 1103                    | 68.2        | 81      | 1103  | EVT                                            | all                                            |

EVT: Endovascular Therapy; N.A.: Not available; PAD: Peripheral arterial disease; nPAD: No peripheral arterial disease; DM: Diabetes mellitus; IC: Intermittent Claudication; CLI: Critical Limb Ischaemia; USA: United States of America; UK: United Kingdom.
